# Supplementary material for: First Adaptation of a Family-Based ACT Model in Mainland China: A Pilot Project
Source: Atypon-hosted journal article supplement (doi:10.1176/appi.ps.201400087), 2015-01-02
Supplement: appi.ps.201400087.ds001.pdf [file appi.ps.201400087.ds001.pdf]

Supplemental content for APPI-PS-2014-00087:

### **Details for admission and exclusion criteria:**

Significant functional impairment is defined as:

- Aged 18-45 years.
- Have been diagnosed as schizophrenia according to the DSM-IV
- Have been diagnosed with schizophrenia for twenty years or fewer.
- Have significant functional impairments as demonstrated by at least one of the following conditions: Significant and persistent difficulty in performing daily living tasks except with significant support or assistance from others; significant and consistent difficulty in maintaining employment at a self-sustaining level or carrying out a homemaker role; and significant difficulty maintaining a safe living situation.
- Have one or more of the following problems, which are indicators of a need for continuous high level of services: High use of acute psychiatric hospitals (e.g., two or more admissions per year; intractable (i.e., persistent or very recurrent) severe major psychiatric symptoms; and difficulty effectively utilizing traditional office-based outpatient services.

The Exclusion Criteria for clients including:

- Refusal to participate in this study
- Individuals with a primary diagnosis of chemical abuse, organic brain disorder, mental retardation, or severe head trauma, or personality disorder

The inclusion criteria of the family include all of the following:

- Family member living with and caring for one relative with a primary diagnosis of schizophrenia, according to DSM-IV, for more than three months
- The family member suffering with schizophrenia is the only family member with mental illness, and this member does not suffer major comorbidity of another mental illness.
- Aged 18 years or over

Table1 Demographic, socio-economic, and clinical characteristics of patients and their caregivers in the ACT and control groups<sup>a</sup>

| Characteristics                                           | Intervention group (n=15) |      | Control group (n=16) |      | Z/X <sup>2</sup> Score | P-value |
|-----------------------------------------------------------|---------------------------|------|----------------------|------|------------------------|---------|
|                                                           | N                         | %    | N                    | %    |                        |         |
| <b>Gender</b>                                             |                           |      |                      |      |                        |         |
| Male                                                      | 10                        | 66.7 | 10                   | 62.5 | .05                    | .809    |
| Female                                                    | 5                         | 33.3 | 6                    | 37.5 |                        |         |
| <b>Age (M±SD)</b>                                         | 30.4±7.6                  |      | 32.9±6.2             |      | .95                    | .342    |
| <b>Marital status</b>                                     |                           |      |                      |      |                        |         |
| Single                                                    | 12                        | 80   | 15                   | 93.8 | 1.64                   | .441    |
| Married                                                   | 2                         | 13.3 | 1                    | 6.2  |                        |         |
| Divorced                                                  | 1                         | 6.7  | 0                    | 0    |                        |         |
| <b>Education Years (M±SD)</b>                             | 10.9±2.9                  |      | 10.5±2.2             |      | .31                    | .759    |
| <b>Work experience</b>                                    |                           |      |                      |      |                        |         |
| Never                                                     | 10                        | 66.7 | 11                   | 68.8 | .02                    | .901    |
| Ever                                                      | 5                         | 33.3 | 5                    | 31.2 |                        |         |
| <b>Duration of illness (M±SD)</b>                         | 13.7±6.6                  |      | 11.7±5.9             |      | .85                    | .394    |
| <b>Number of hospitalization (M±SD)</b>                   | 3.67                      | 3.24 | 3.94                 | 3.07 | .60                    | .549    |
| <b>Number of hospitalization in last two years (M±SD)</b> | .9±1.4                    |      | .7±.8                |      | .15                    | .879    |
| <b>Caregivers' age</b>                                    |                           |      |                      |      |                        |         |
| 35-45                                                     | 3                         | 20   | 2                    | 12.5 | .42                    | .936    |
| 46-55                                                     | 4                         | 26.7 | 4                    | 25   |                        |         |
| 56-65                                                     | 7                         | 46.7 | 9                    | 56.3 |                        |         |
| 66 or above                                               | 1                         | 6.6  | 1                    | 6.2  |                        |         |
| <b>Caregivers' biological relationship</b>                |                           |      |                      |      |                        |         |
| Parent                                                    | 14                        | 93.3 | 15                   | 93.7 | 2.00                   | .367    |
| Sibling                                                   | 1                         | 6.7  | 0                    | 0    |                        |         |
| Spouse                                                    | 0                         | 0    | 1                    | 6.3  |                        |         |
| <b>Number of family members (M±SD)</b>                    | 2.1±1.0                   |      | 1.6±.5               |      | 1.89                   | .059    |
| <b>Economic condition</b>                                 |                           |      |                      |      |                        |         |
| Low-income family                                         | 6                         | 40   | 9                    | 56.3 | .82                    | .366    |
| Non-low-income family                                     | 9                         | 60   | 7                    | 43.7 |                        |         |

<sup>a</sup> Means were compared by nonparametric tests, and proportions were compared by chi square tests

Table 2 Fidelity score of our ACT team measured by Dartmouth Assertive Community Treatment Scale

Table 3: Before-after 3 months Comparison in clinical outcomes between ACT and control group

| <b>Criterion</b>                                         |                                                | <b>Score</b> |
|----------------------------------------------------------|------------------------------------------------|--------------|
| <b><i>Human resources: Structure and composition</i></b> |                                                | <b>47</b>    |
| H1                                                       | Small caseload                                 | 5            |
| H2                                                       | Team approach                                  | 5            |
| H3                                                       | Program meeting                                | 5            |
| H4                                                       | Practicing ACT leader                          | 4            |
| H5                                                       | Continuity of staffing                         | 4            |
| H6                                                       | Staff capacity                                 | 4            |
| H7                                                       | Psychiatrist on team                           | 5            |
| H8                                                       | Nurse on team                                  | 5            |
| H9                                                       | Substance abuse specialist on team             | 1            |
| H10                                                      | Vocational specialist on team                  | 5            |
| H11                                                      | Program size                                   | 4            |
| <b><i>Organizational boundaries</i></b>                  |                                                | <b>27</b>    |
| O1                                                       | Explicit admission criteria                    | 5            |
| O2                                                       | Intake rate                                    | 4            |
| O3                                                       | Full responsibility for treatment services     | 4            |
| O4                                                       | Responsibility for crisis services             | 3            |
| O5                                                       | Responsibility for hospital admissions         | 3            |
| O6                                                       | Responsibility for hospital discharge planning | 3            |
| O7                                                       | Time-unlimited services (graduation rate)      | 5            |
| <b><i>Nature of services</i></b>                         |                                                | <b>30</b>    |
| S1                                                       | Community-based services                       | 5            |
| S2                                                       | No dropout policy                              | 5            |
| S3                                                       | Assertive engagement mechanisms                | 2            |
| S4                                                       | Intensity of service                           | 5            |
| S5                                                       | Frequency of contact                           | 3            |
| S6                                                       | Work with informal support system              | 5            |
| S7                                                       | Individualized substance abuse treatment       | 1            |
| S8                                                       | Dual disorder treatment groups                 | 1            |
| S9                                                       | Dual Disorders (DD) Model                      | 1            |
| S10                                                      | Role of consumers on treatment team            | 2            |

Table 3: Before-after 3 months Intervention Comparison in clinical outcomes between ACT and control group

| Scales                              | ACT group (n=15) |                             | Control group (n=16) |                             | Before-after 3 months intervention comparison between groups |          |
|-------------------------------------|------------------|-----------------------------|----------------------|-----------------------------|--------------------------------------------------------------|----------|
|                                     | Pre-intervention | 3 months after intervention | Pre-intervention     | 3 months after intervention | Z SCORE                                                      | P-value  |
| <b>PANSS</b>                        |                  |                             |                      |                             |                                                              |          |
| Total score                         | 82.13±12.20      | 64.6±14.0                   | 81.75±19.89          | 87.19±21.39                 | 3.581                                                        | <0.001** |
| Positive scale                      | 24.87±7.92       | 19.4±7.77                   | 25.38±7.20           | 26.06±7.637                 | 2.933                                                        | 0.003**  |
| Negative scale                      | 17.87±5.42       | 13.4±3.92                   | 17.25±6.47           | 18.44±7.033                 | 4.245                                                        | <0.001** |
| General psychopathology scale       | 39.4±5.65        | 31.8±5.56                   | 39.13±9.55           | 42.69±10.69                 | 3.013                                                        | 0.003**  |
| <b>SDSS</b>                         |                  |                             |                      |                             |                                                              |          |
| Total score                         | 16.37±2.97       | 11.10±3.68                  | 16.75±2.84           | 17.06±2.59                  | 4.265                                                        | <0.001** |
| <b>PSP</b>                          |                  |                             |                      |                             |                                                              |          |
| Total score                         | 43.07±9.38       | 55.8±8.46                   | 42.81±11.23          | 41.0±10.35                  | 3.693                                                        | <0.001** |
| Socially useful activities          | 4.27±0.59        | 3.67±0.49                   | 4.44±0.51            | 4.25±0.68                   | 1.586                                                        | 0.113    |
| Personal and Social relationships   | 4.13±0.52        | 3.27±0.59                   | 4.13±0.72            | 4.19±0.54                   | 3.262                                                        | 0.001**  |
| Self-care                           | 3.53±1.06        | 2.93±0.88                   | 3.44±0.81            | 3.75±0.68                   | 3.346                                                        | 0.001*   |
| Disturbing and aggressive behaviors | 1.60±0.91        | 1.27±0.70                   | 1.81±0.98            | 1.94±1.06                   | 1.848                                                        | 0.065    |

a. \*P<0.05; \*\*P<0.01

b. Before-after 3 months intervention comparison between two groups was tested by 2-independent samples nonparametric test using the differences values in each group (3 months after intervention scores - pre-intervention scores).
